# Supplementary material for: Rare Collagenous Heterozygote Variants in Children With IgA Nephropathy
Source: PubMed Central journal article supplement — Kidney Int Rep. 2021 Mar 3;6(5):1326–35. doi: 10.1016/j.ekir.2021.02.022 (PMC8116726; doi:10.1016/j.ekir.2021.02.022), 2021-03-03
Supplement: mmc1.pdf [file mmc1.pdf]

## SUPPLEMENTARY DATA

### S1. Description of COL4A3-cIgAN families

Abbreviations: CADD, Combined Annotation Dependent Depletion; D, damaging; PP-2, Polyphen-2; gnomAD AF, allele frequency (AF) in gnomAD controls database

†Classification criteria are detailed in the Associated American College of Medical Genetics and Genomics (ACMG) guidelines (doi: 10.1038/gim.2015.30.)

### Supplementary figure S1

| Family | Gene   | C.hgvs    | P.hgvs   | dbSNP ID    | CADD | PP-2 | SIFT | MutTaster | gnomAD AF (controls) | Supporting ACMG Criteria† |
|--------|--------|-----------|----------|-------------|------|------|------|-----------|----------------------|---------------------------|
| 1      | COL4A3 | c.3829G>A | p.G1277S | rs190598500 | 23.5 | D    | D    | D         | 0.00035              | PM1;PM2;PP2;PP3           |
|        |        | c.4510T>C | p.F1504L | rs201671013 | 24.5 | D    | D    | D         | 0.00024              | PM1;PM2;PM3;PP2;PP3       |
| 2      | COL4A3 | c.3829G>A | p.G1277S | rs190598500 | 23.5 | D    | D    | D         | 0.00035              | PM1;PM2;PP1;PP2;PP3       |
| 3      | COL4A3 | c.4421T>C | p.L1474P | rs200302125 | 23.4 | D    | D    | D         | 0.0023               | PM1;PM2;PP2;PP3;PP5       |
| 4      | COL4A3 | c.4510T>C | p.F1504L | rs201671013 | 24.5 | D    | D    | D         | 0.00024              | PM1;PM2;PP2;PP3           |
